# Supplementary material for: Conformation of alkali metal ion-calix[4]arene complexes investigated by IR spectroscopy in the gas phase
Source: Royal Society of Chemistry journal article supplement (doi:10.1039/c9cp03194d), 2019-01-01
Supplement: c9cp03194d1.pdf [file c9cp03194d1.pdf]

## **Conformation of Alkali Metal Ion-Calix[4]arene Complexes**

### **Investigated by IR Spectroscopy in the Gas Phase**

**Kozue Wada, Motoki Kida, Satoru Muramatsu, Takayuki Ebata, and  
Yoshiya Inokuchi\***

*Department of Chemistry, Graduate School of Science, Hiroshima University,*

*Higashi-Hiroshima, Hiroshima 739-8526, Japan*

E-mail: y-inokuchi@hiroshima-u.ac.jp

**Electronic Supplementary Information**

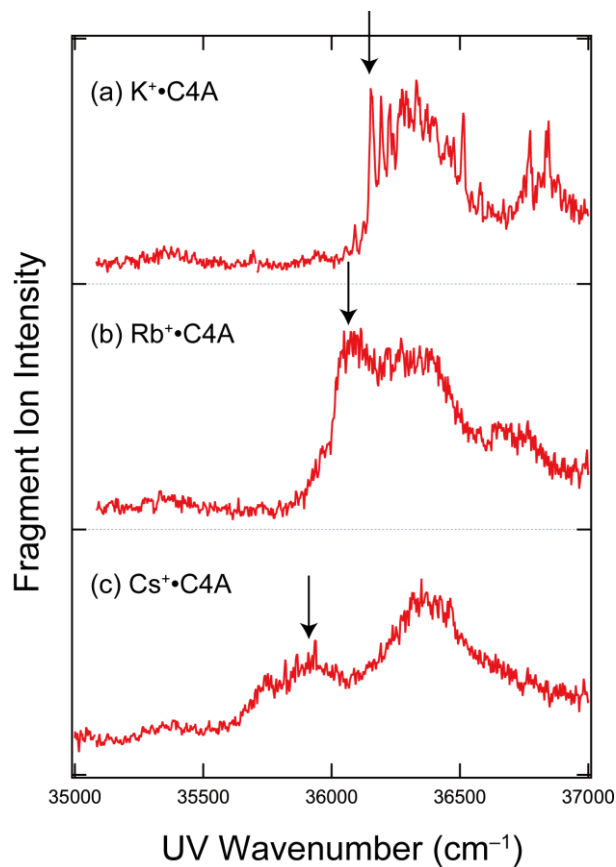

**Figure S1.** The UVPD spectra of the (a)  $\text{K}^+\cdot\text{C4A}$ , (b)  $\text{Rb}^+\cdot\text{C4A}$ , and (c)  $\text{Cs}^+\cdot\text{C4A}$  complexes. These spectra are reproduced from our previous paper (*Phys. Chem. Chem. Phys.*, 2017, **19**, 12857). The IR-UV spectra in Figs. 1 and 3 are measured at 36156, 36080, and 35920  $\text{cm}^{-1}$  for  $\text{K}^+\cdot\text{C4A}$ ,  $\text{Rb}^+\cdot\text{C4A}$ , and  $\text{Cs}^+\cdot\text{C4A}$ , respectively. The UV positions for the IR-UV measurement are shown with black arrows.

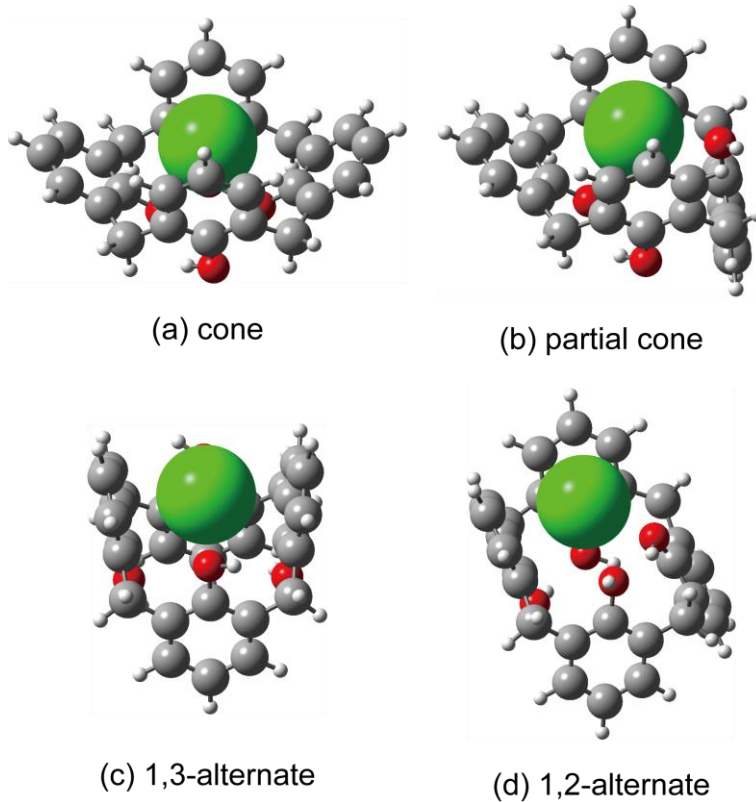

**Figure S2.** Stable structures of the  $K^+ \cdot C_{4A}$  complexes. Geometry optimization is performed at the !B97X-D/6-311++G(d,p) level of theory

**Table S1.** Relative total energies (kJ/mol) of stable isomers for the  $M^+$ -C4A ( $M = K, Rb,$  and  $Cs$ ) complexes calculated at the !B97X-D/6-311++G(d,p) level of theory. These values are corrected by the zero point energy.

| M  | cone | partial cone | 1,3-alternate | 1,2-alternate |
|----|------|--------------|---------------|---------------|
| K  | 0    | 15.9         | 34.2          | 63.5          |
| Rb | 0    | 20.7         | 48.1          | 59.1          |
| Cs | 0    | 26.1         | 57.6          | 62.2          |
